# Supplementary material
Source: PubMed Central journal article supplement (PMC5266633)
Supplement: NIHMS816396-supplement-2.pdf [file NIHMS816396-supplement-2.pdf]

**Subject:** Form submission from: Open Access Policy Waiver

**From:** Georgia Tech Library via Georgia Tech Library <no-reply@library.gatech.edu>

**Date:** 9/1/2016 12:29 PM

**To:** dmyers30 <dmyers30@mail.gatech.edu>

Submitted on Thursday, September 1, 2016 - 12:29

Submitted by user: dmyers30

Request Waiver: As the author, I hereby give notification that the application of the Georgia Tech Open Access policy shall be waived for the article referenced in this form.

Article Title: Single-platelet nanomechanics measured by high-throughput cytometry

Article Author(s): Myers, DR; Qiu Y; Fay ME; Tennenbaum M; Cuadrado J; Baek J; Tran R; Ciciliano J; Mannino R; Fernandez-Nieves A; Sulchek T; Lam W

Email: [dmyers30@mail.gatech.edu](mailto:dmyers30@mail.gatech.edu)

To be published in: Nature Materials

You can provide this email to your publisher as confirmation that the Georgia Tech Open Access policy has been waived for this submission.
