# Supplementary material
Source: PubMed Central journal article supplement (PMC5266633)
Supplement: NIHMS816396-supplement-3.pdf [file NIHMS816396-supplement-3.pdf]

Begin forwarded message:

**From:** Boston University Libraries <[open-help@bu.edu](mailto:open-help@bu.edu)>  
**Subject:** Waiver confirmation: Single-platelet nanomechanics measured by high-throughput cytometry  
**Date:** September 2, 2016 at 2:38:39 PM EDT  
**To:** <[msmith@bu.edu](mailto:msmith@bu.edu)>  
**Reply-To:** <[open-help@bu.edu](mailto:open-help@bu.edu)>

Dear [msmith@bu.edu](mailto:msmith@bu.edu),

Thank you for submitting the following article to the BU Libraries in compliance with the Boston University opt-out open access policy:

Single-platelet nanomechanics measured by high-throughput cytometry  
Nature Materials  
Nature Publishing Group

You have indicated to us that you are opting out of the non-exclusive license transfer for this article to BU. The waiver is granted automatically. This email serves as a confirmation. Please forward this email to the author, if you are submitting on behalf of someone else. If you are the author, please forward it to the publisher if requested. If the publisher has further questions, please ask them to email us at [open-help@bu.edu](mailto:open-help@bu.edu) or call Vika Zafrin, Institutional Repository Librarian, at 617.358.6370.

Many thanks,

Boston University Libraries  
Digital Initiatives and Open Access
