# Supplementary material
Source: PubMed Central journal article supplement (PMC5266633)
Supplement: NIHMS816396-supplement-4.pdf [file NIHMS816396-supplement-4.pdf]

---

**From:** UNC Open Access Waiver Request <[libsys@unc.edu](mailto:libsys@unc.edu)>  
**Sent:** Thursday, September 1, 2016 4:41 PM  
**To:** Brown, Ashley Carson  
**Subject:** UNC Open Access Waiver Request Receipt

Pursuant to the Open Access Policy adopted by the Faculty at UNC-Chapel Hill and effective January 1, 2016, this communication serves to notify you that your request for a waiver of the Open Access license has been granted. UNC-Chapel Hill may not revoke this waiver and will have no license under the policy unless you choose to relinquish the waiver. Please feel free to contact Anne Gilliland, [anne\\_gilliland@unc.edu](mailto:anne_gilliland@unc.edu), if you have questions about this waiver. This waiver is granted for the following request.

|                          |                                                                     |
|--------------------------|---------------------------------------------------------------------|
| <b>Name (full)</b>       | Ashley Brown                                                        |
| <b>UNC email address</b> | <a href="mailto:aecarso2@email.unc.edu">aecarso2@email.unc.edu</a>  |
| <b>Department</b>        | Department of Biomedical Engineering                                |
| <b>Article title</b>     | Single-platelet nanomechanics measured by high-throughput cytometry |
| <b>Journal title</b>     | Nature Materials                                                    |

--

**Ashley C. Brown, PhD**  
**Assistant Professor**  
Joint Department of Biomedical Engineering  
NC State University/UNC-Chapel Hill  
4204B Engineering Building III  
Raleigh, NC 27695  
919-513-8231  
<http://awrl.bme.unc.edu/>
